# Supplementary material for: Macrocycle with Equatorial Coordination Sites Provides New Opportunity for Structure-Diverse Metallacages
Source: MDPI journal article supplement (doi:10.3390/molecules28062537), 2023-03-10
Supplement: s1 [file s1]

*Supporting Information*

# Macrocycle with Equatorial Coordination Sites Provides New Opportunity for Structure-Diverse Metallacages

Yibo Zhao <sup>1</sup>, Yunfeng Lu <sup>2</sup>, Ao Liu <sup>2</sup>, Zhi-Yuan Zhang <sup>2,\*</sup>, Chunju Li <sup>2,\*</sup>  
and Andrew C.-H. Sue <sup>1,\*</sup>

<sup>1</sup> School of Pharmaceutical Science and Technology, Tianjin University,  
Tianjin 300387, China

<sup>2</sup> Tianjin Key Laboratory of Structure and Performance for Functional  
Molecules, College of Chemistry, Tianjin Normal University, Tianjin 300387,  
China

\* Correspondence: zzy@tjnu.edu.cn (Z.-Y.Z.); cjli@shu.edu.cn (C.L.);  
andrewsue@xmu.edu.cn (A.C.-H.S.)

## **Table of Contents**

|                                                                                    |                |
|------------------------------------------------------------------------------------|----------------|
| <b>Section I. Synthesis and characterization of self-assembled metallacages...</b> | <b>S2-S22</b>  |
| <b>Section II. Single-crystal structures of TP3 and M2.....</b>                    | <b>S23-S26</b> |

## Section I. Synthesis and characterization of self-assembled metallacages

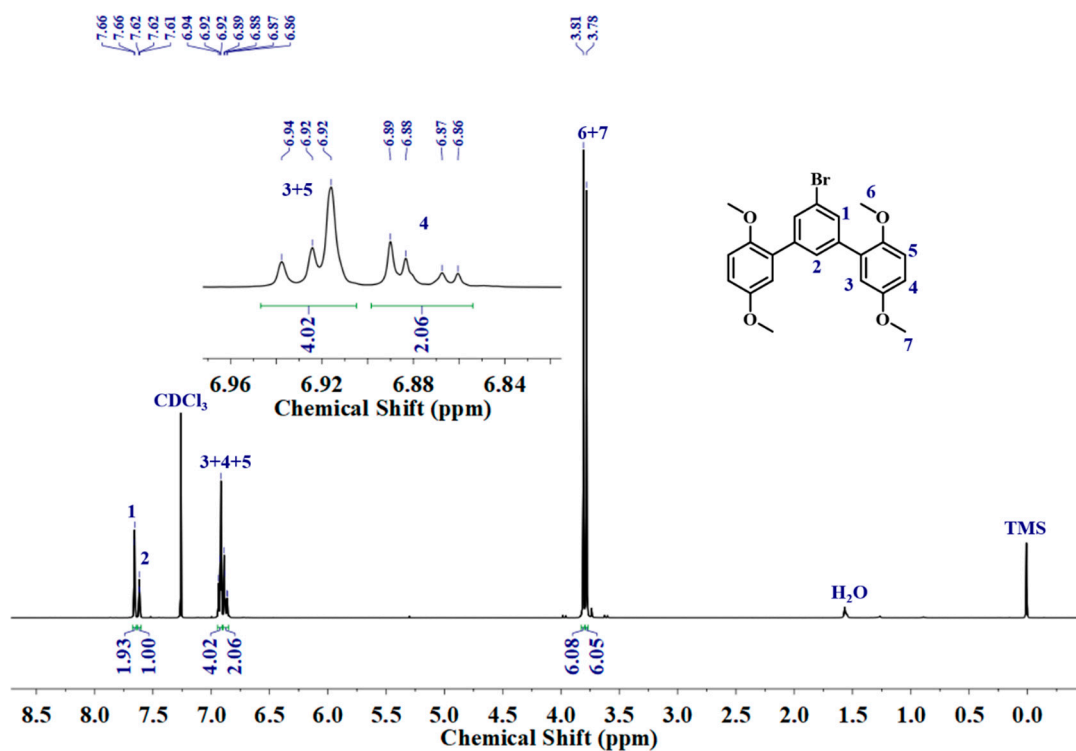

**Figure S1.** <sup>1</sup>H NMR spectrum (400 MHz, CDCl<sub>3</sub>, 298 K) of 5'-bromo-2,2'',5,5''-tetramethoxy-1,1':3',1''-terphenyl.

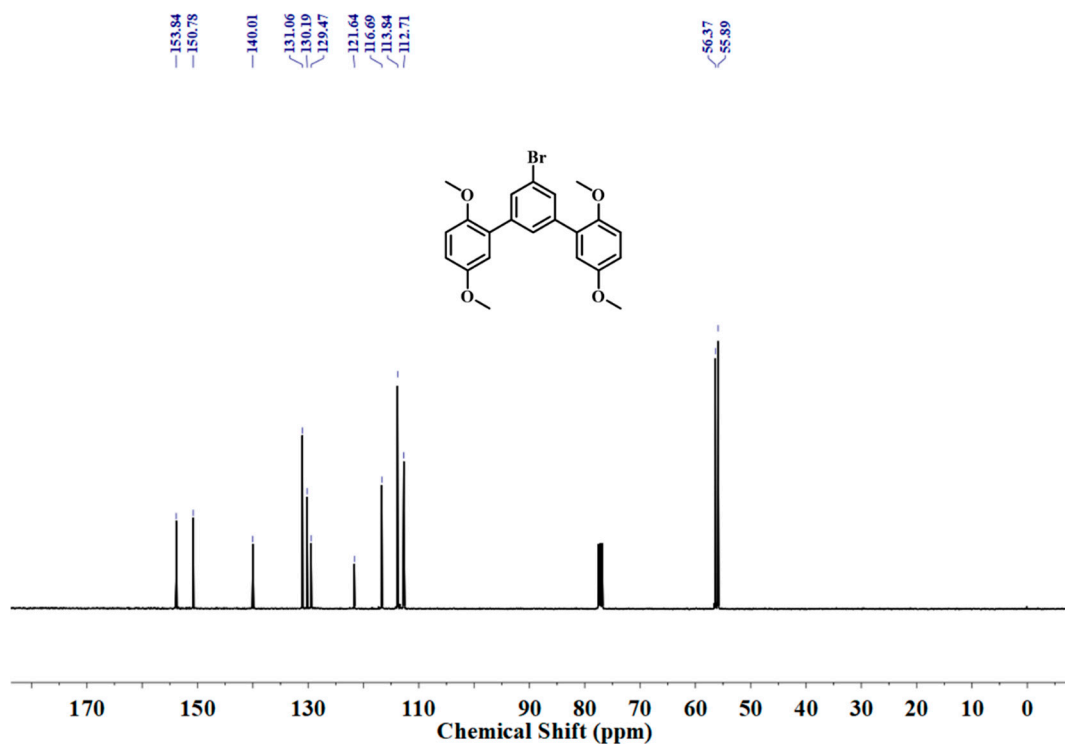

**Figure S2.** <sup>13</sup>C NMR spectrum (100 MHz, CDCl<sub>3</sub>, 298 K) of 5'-bromo-2,2'',5,5''-tetramethoxy-1,1':3',1''-terphenyl.

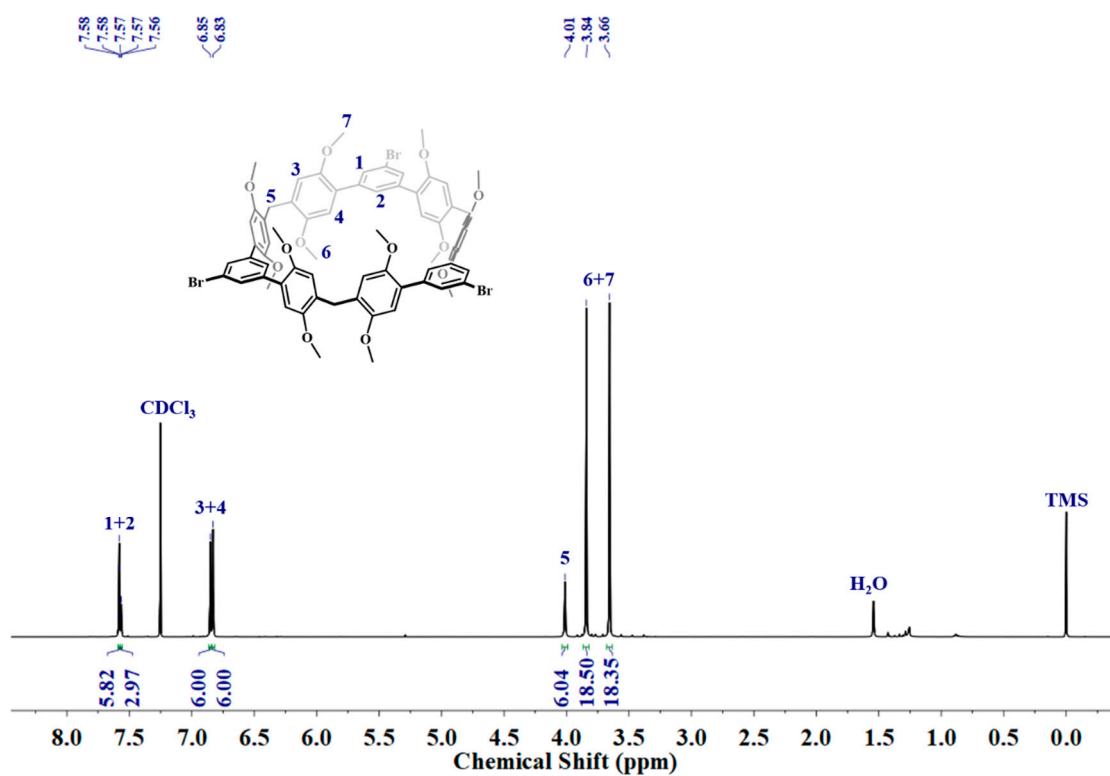

Figure S3.  $^1\text{H}$  NMR spectrum (400 MHz,  $\text{CDCl}_3$ , 298 K) of TP3-Br.

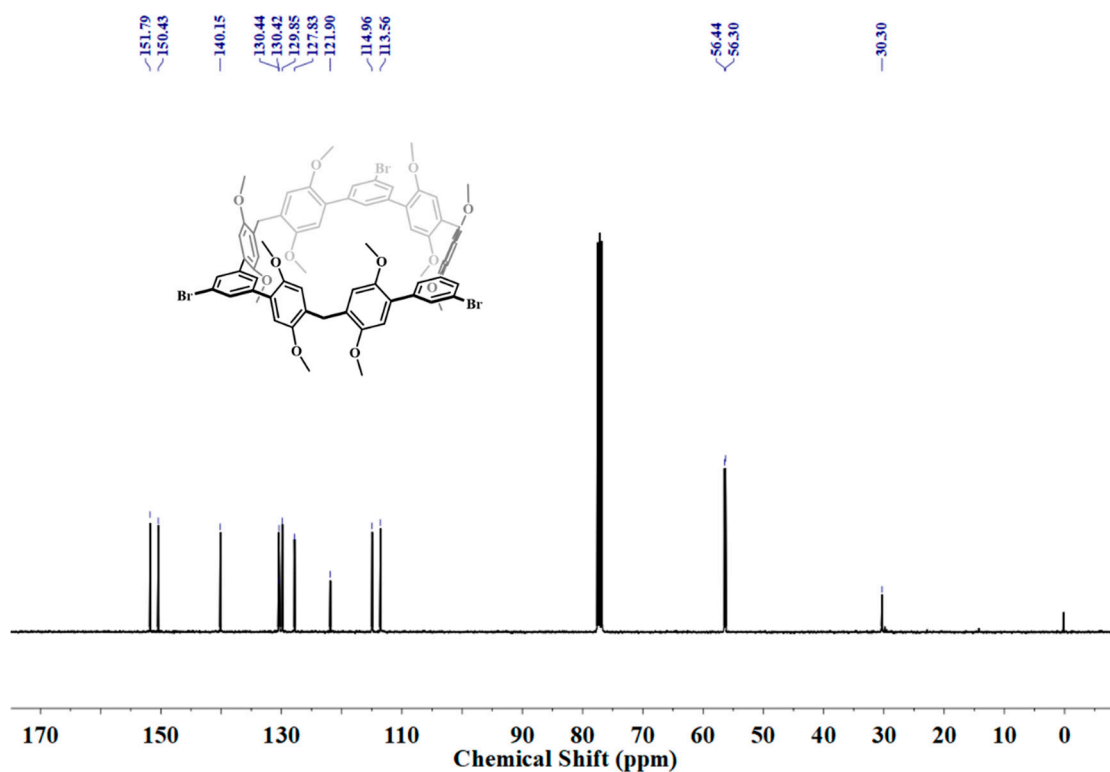

Figure S4.  $^{13}\text{C}$  NMR spectrum (100 MHz,  $\text{CDCl}_3$ , 298 K) of TP3-Br.



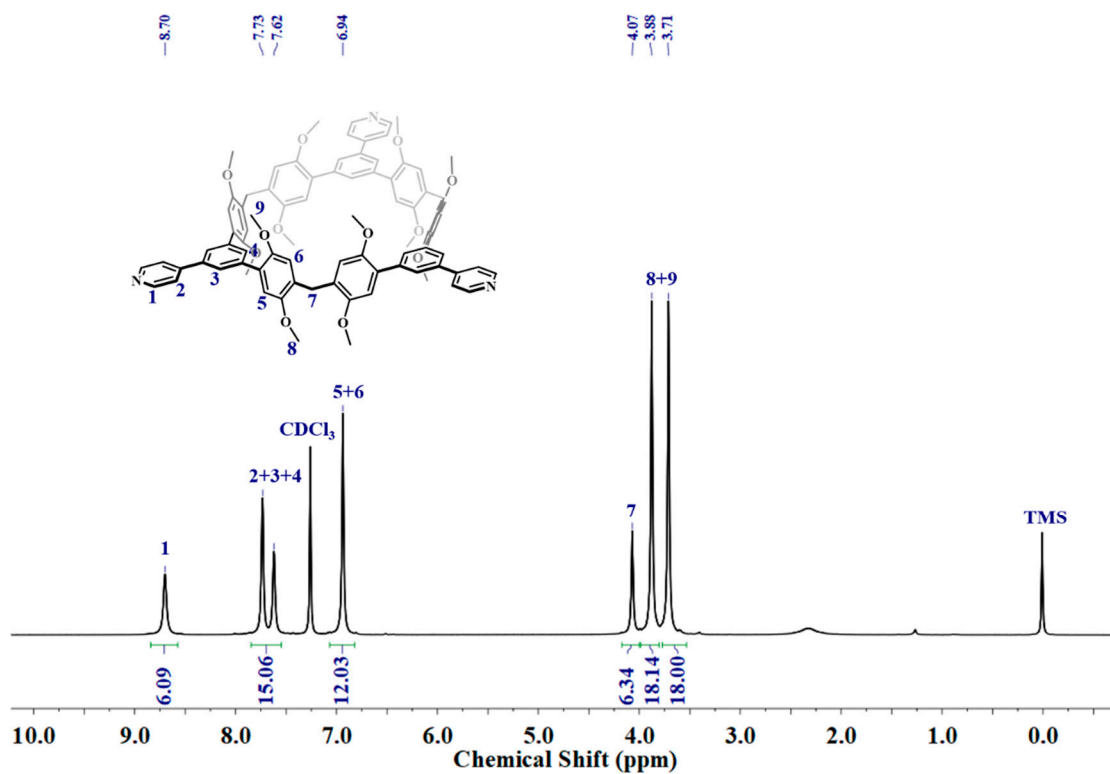

**Figure S5.** <sup>1</sup>H NMR spectrum (600 MHz, CDCl<sub>3</sub>, 298 K) of TP3.

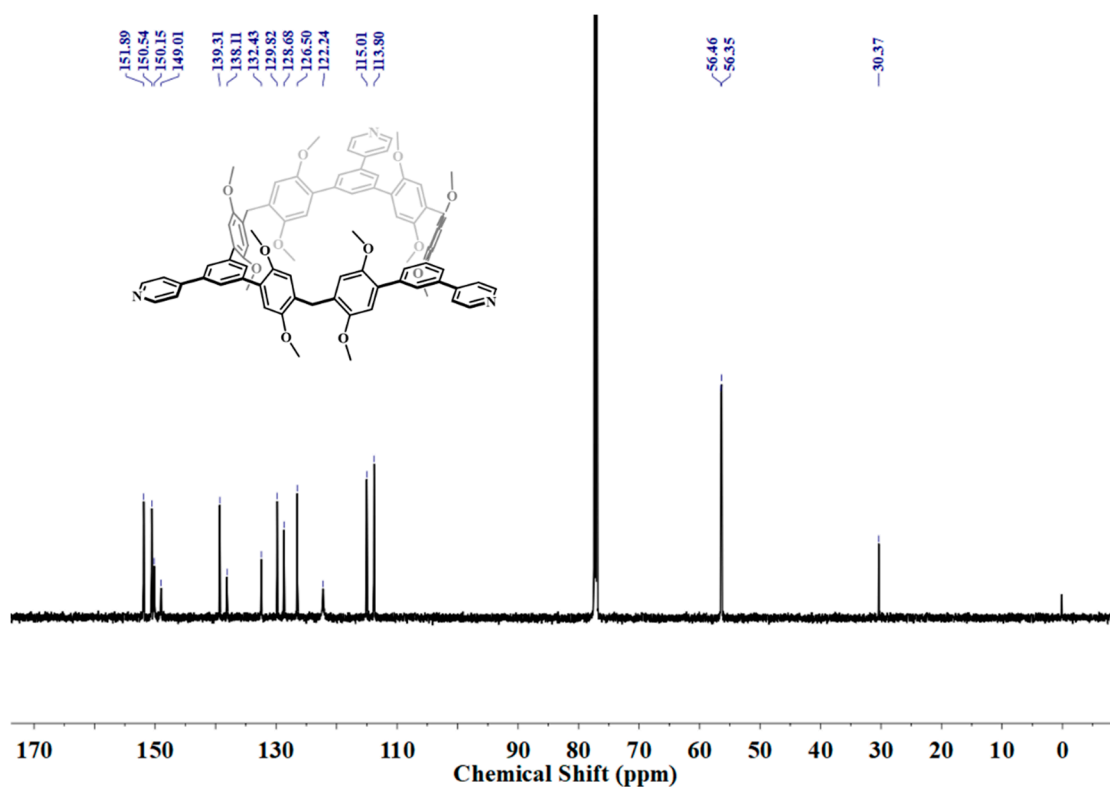

**Figure S6.** <sup>13</sup>C NMR spectrum (100 MHz, CDCl<sub>3</sub>, 298 K) of TP3-Br.

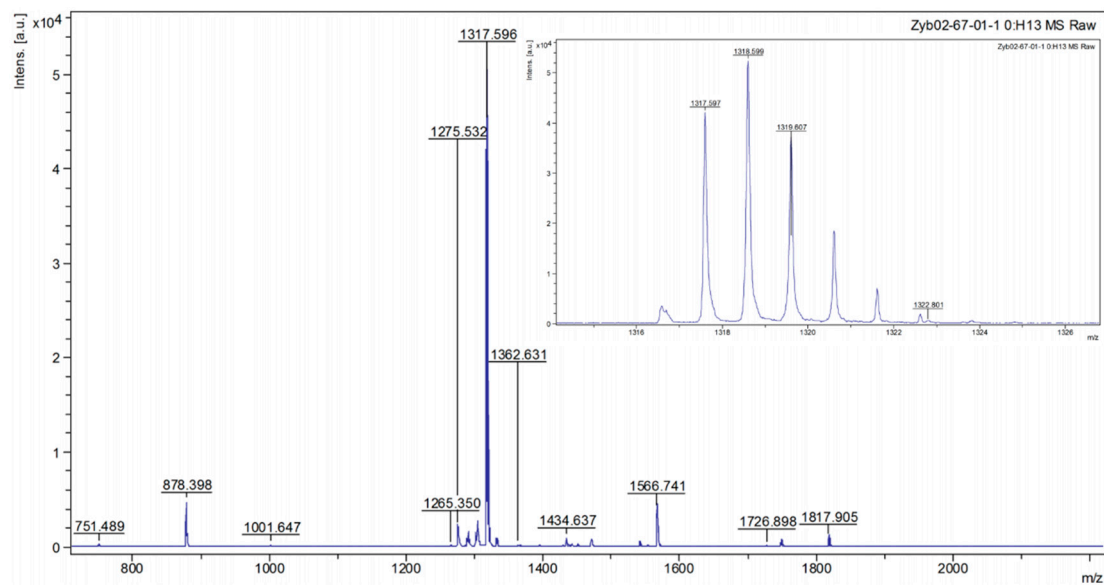

**Figure S7.** MALDI-TOF MS of TP3-Br.

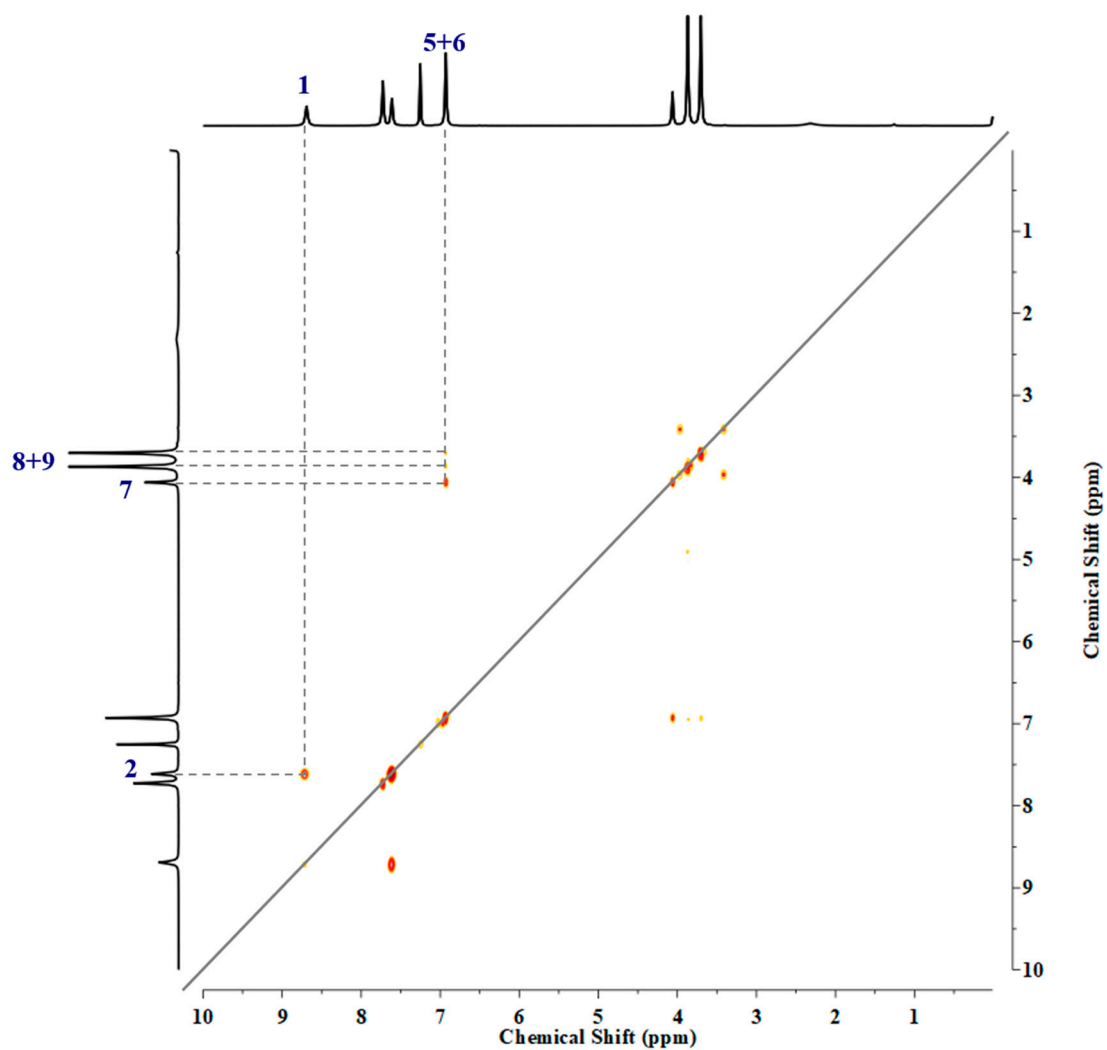

**Figure S8.** 2D COSY spectrum (400 MHz, CDCl<sub>3</sub>, 298 K) of TP3-Br.

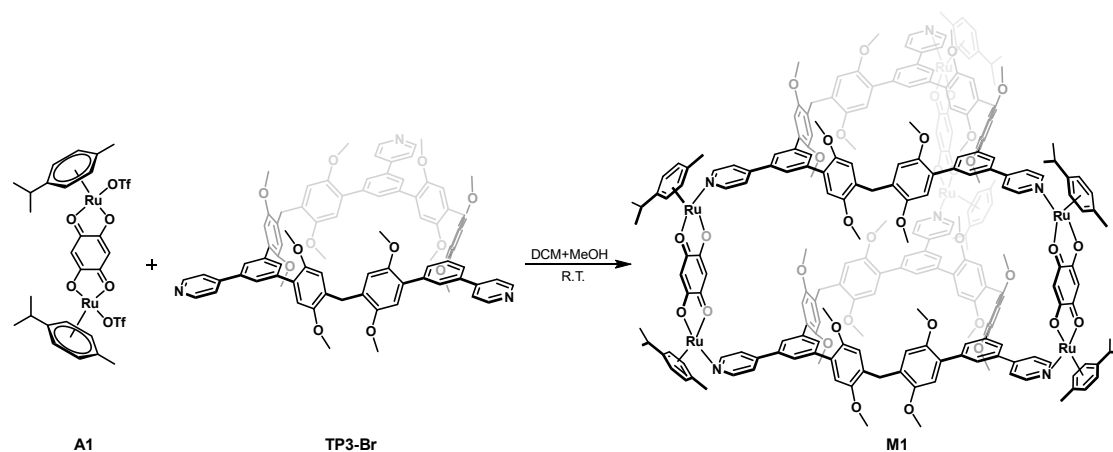

**Scheme S1.** Synthetic routes for the **M1**.

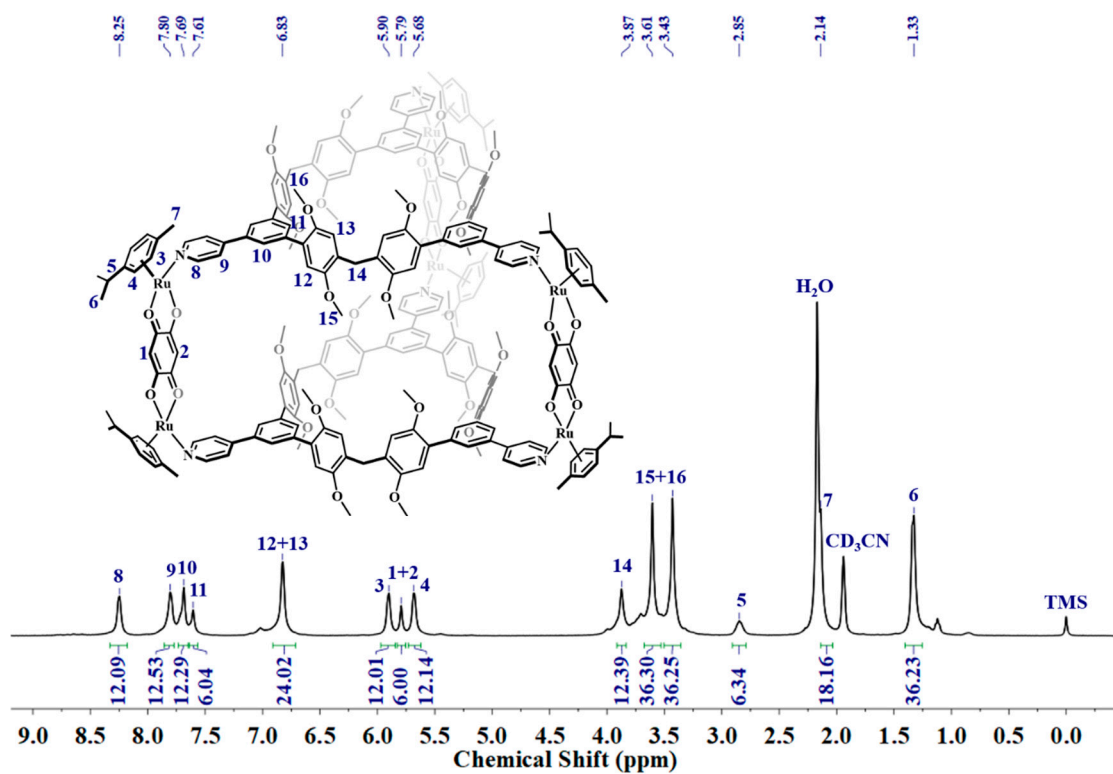

**Figure S9.**  $^1\text{H}$  NMR spectrum (400 MHz,  $\text{CD}_3\text{CN}$ , 298 K) of **M1**.

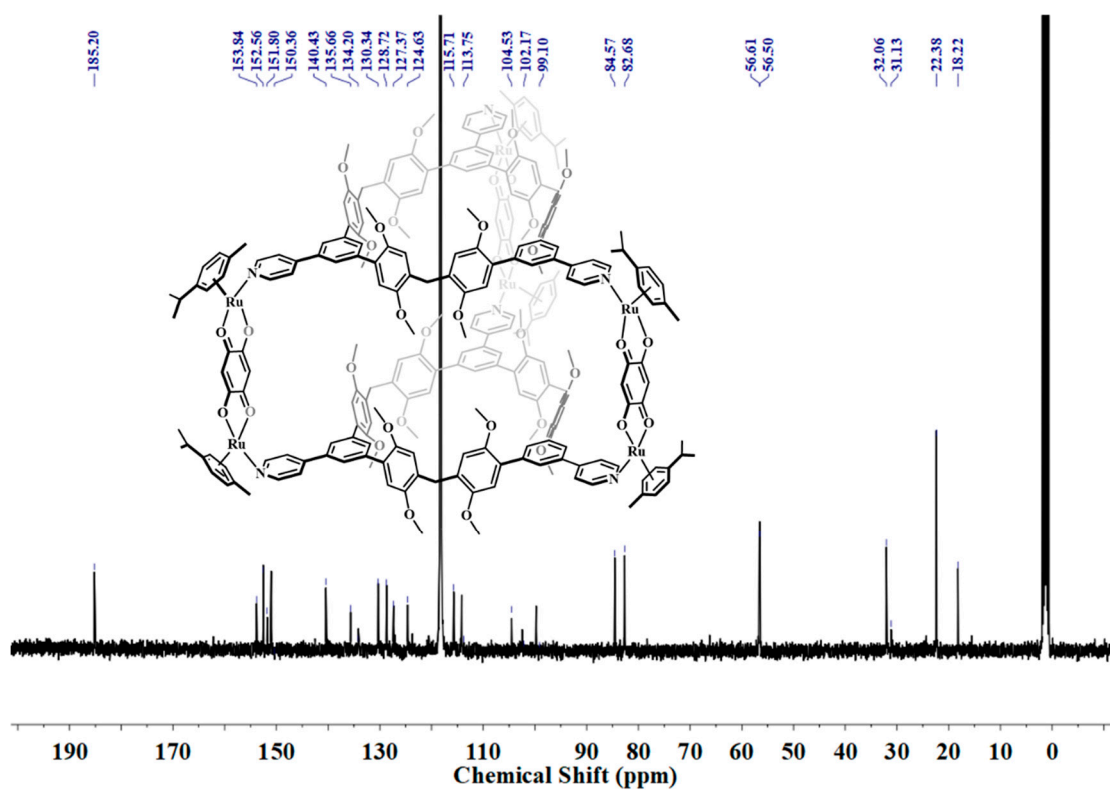

**Figure S10.**  $^{13}\text{C}$  NMR spectrum (100 MHz,  $\text{CD}_3\text{CN}$ , 298 K) of **M1**.

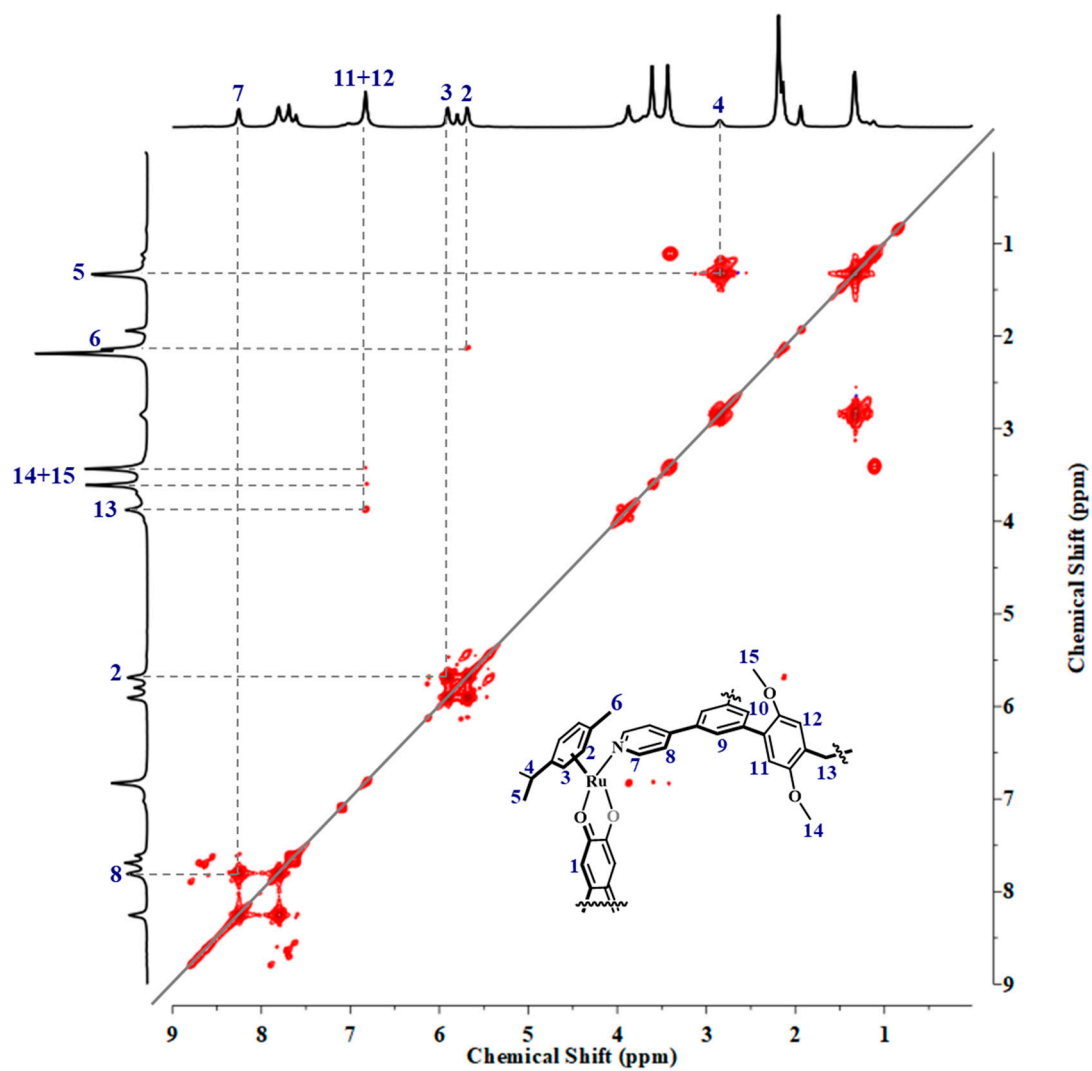

**Figure S11.** 2D COSY spectrum (400 MHz, CD<sub>3</sub>CN, 298 K) of **M1**.

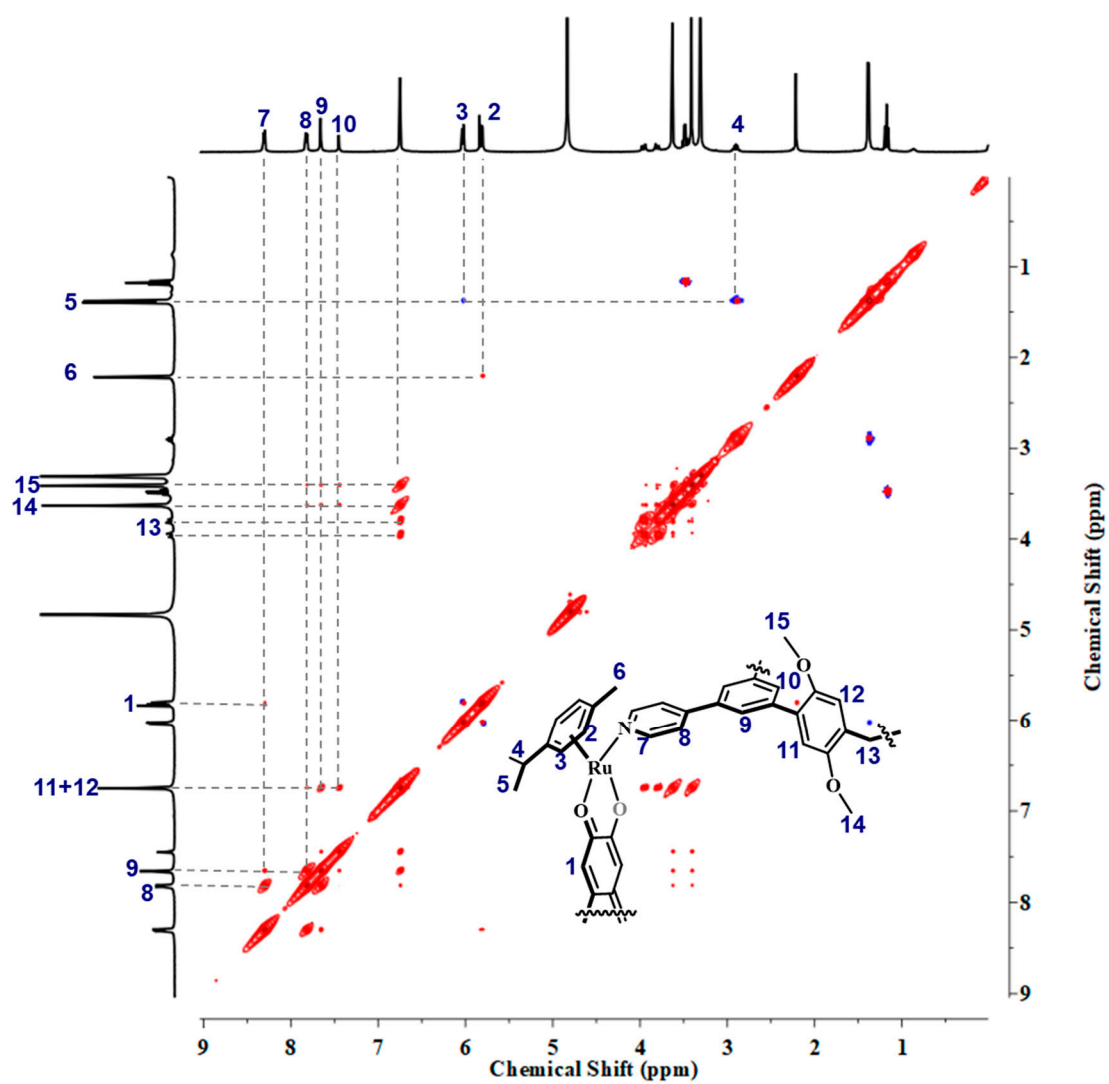

**Figure S12.** 2D NOESY spectrum (400 MHz, CD<sub>3</sub>CN, 298 K) of **M1**.

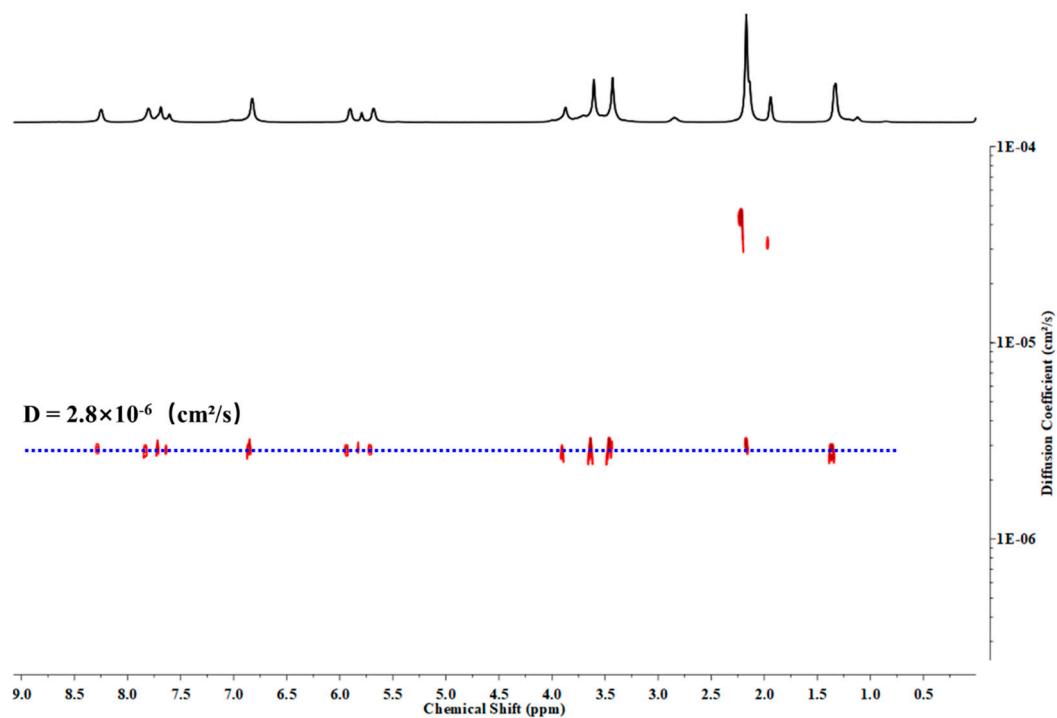

**Figure S13.** DOSY spectrum (400 MHz, CD<sub>3</sub>CN, 298 K) of **M1**.

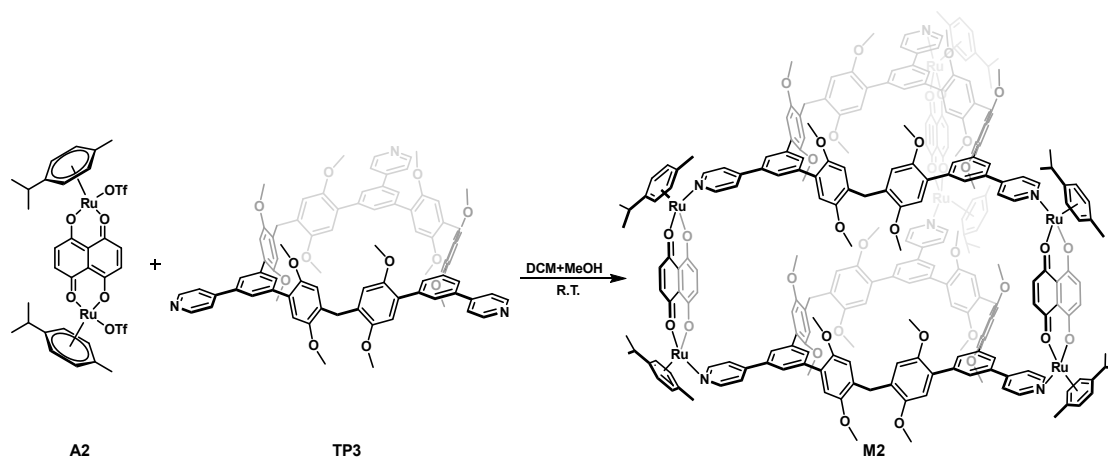

**Scheme S2.** Synthetic routes for the **M2**.

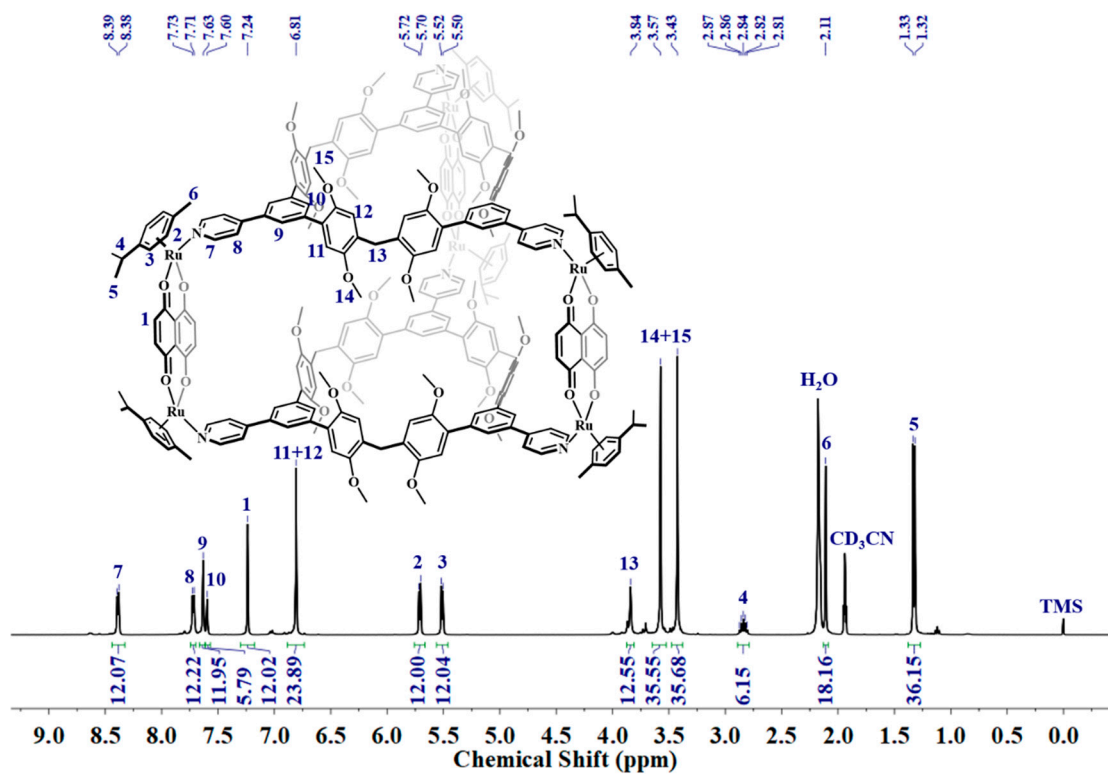

Figure S14. <sup>1</sup>H NMR spectrum (400 MHz, CD<sub>3</sub>CN, 298 K) of **M2**.

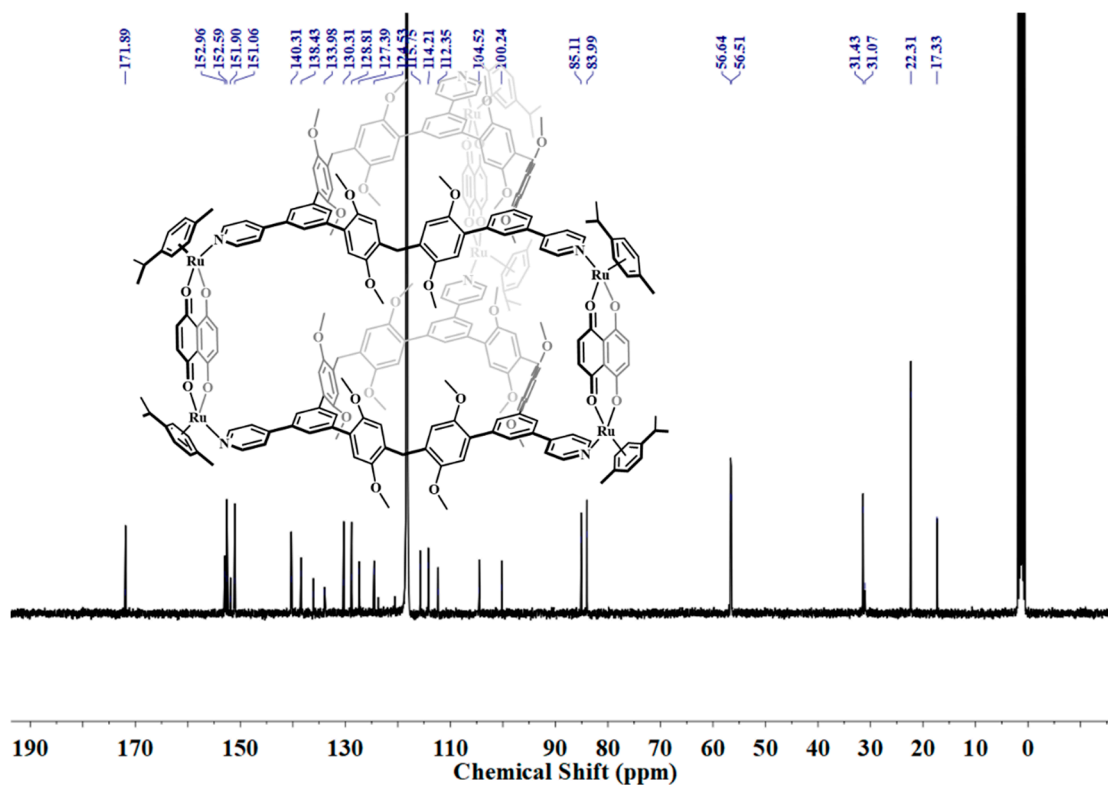

Figure S15. <sup>13</sup>C NMR spectrum (100 MHz, CD<sub>3</sub>CN, 298 K) of **M2**.



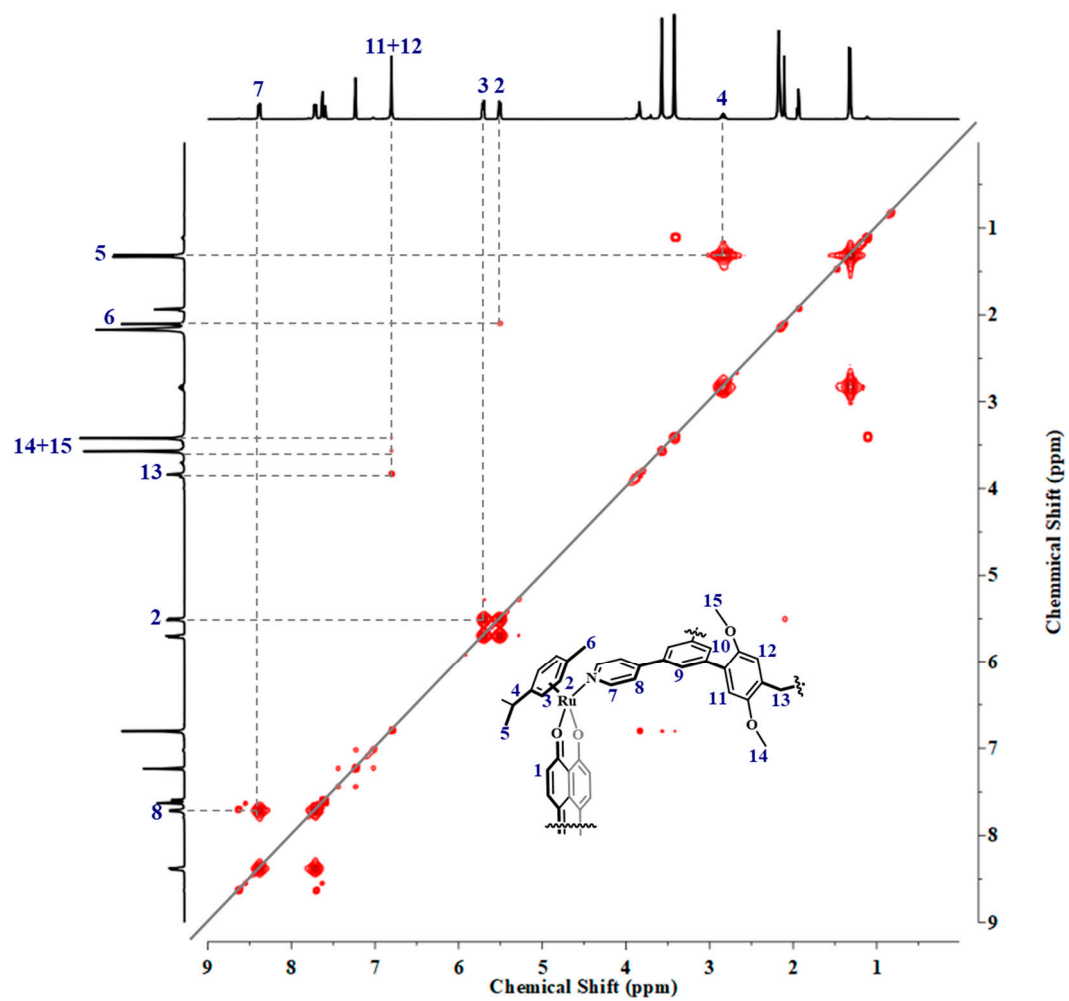

**Figure S16.** 2D COSY spectrum (400 MHz, CD<sub>3</sub>CN, 298 K) of **M2**.

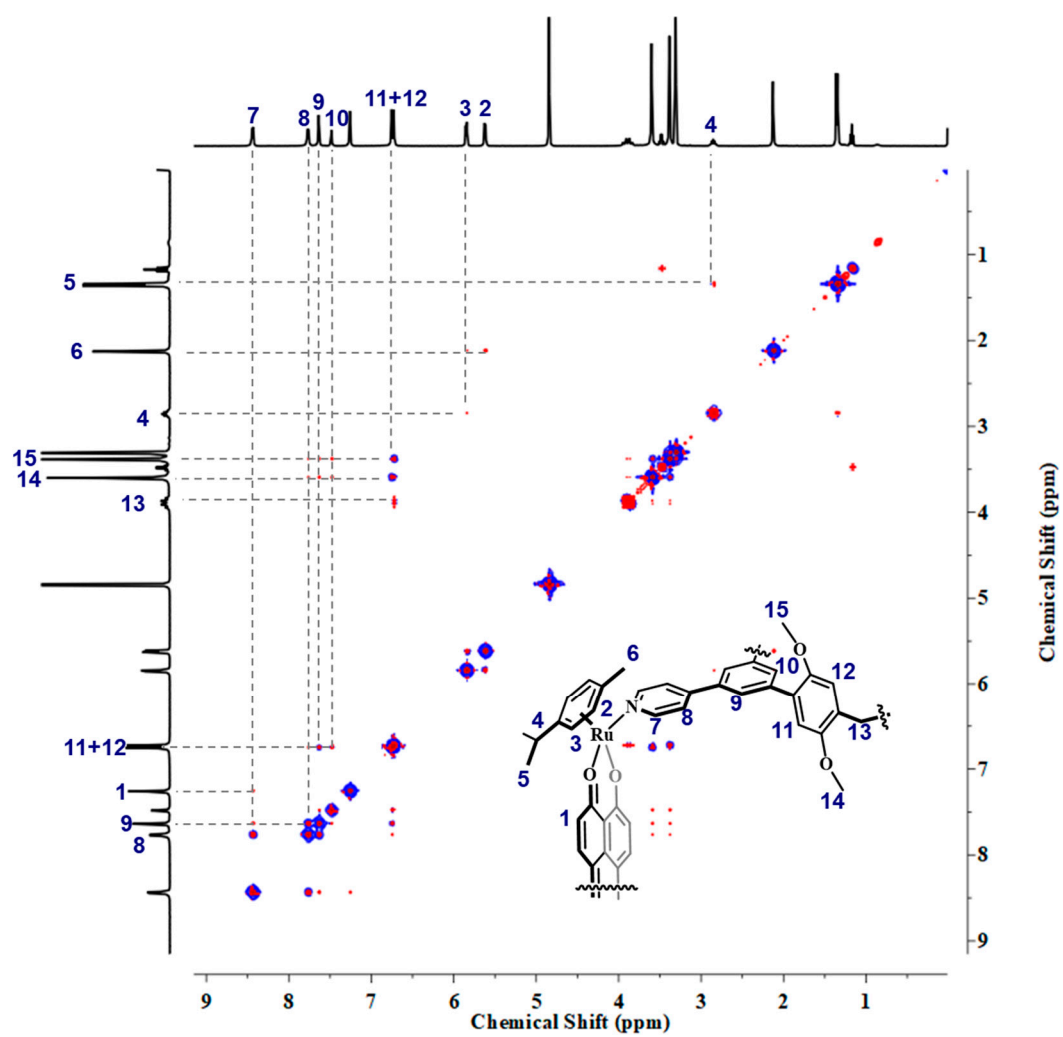

**Figure S17.** 2D NOESY spectrum (400 MHz, CD<sub>3</sub>CN, 298 K) of **M2**.

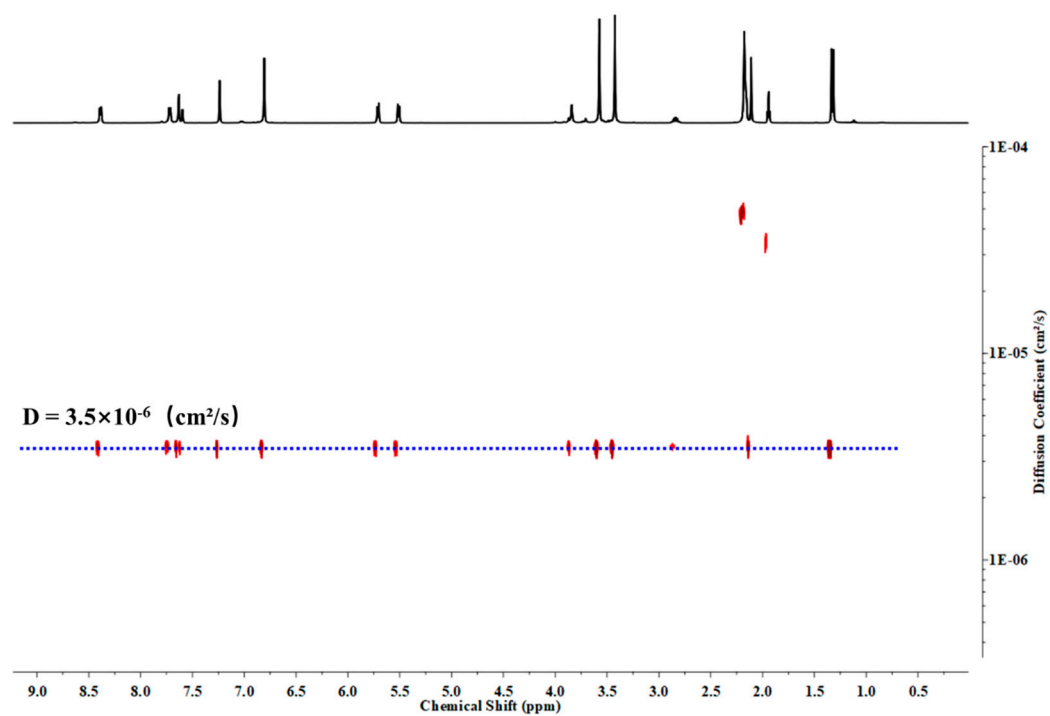

**Figure S18.** DOSY spectrum (400 MHz, CD<sub>3</sub>CN, 298 K) of **M2**.

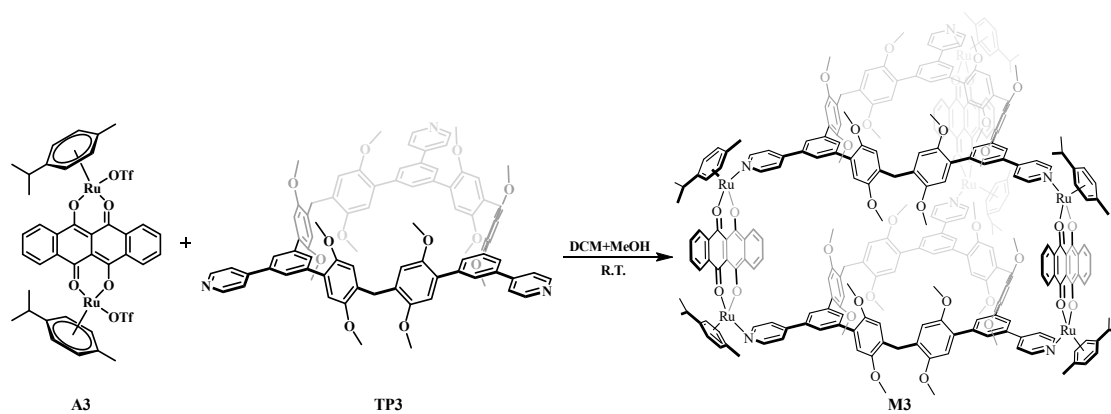

**Scheme S3.** Synthetic routes for the **M3**.

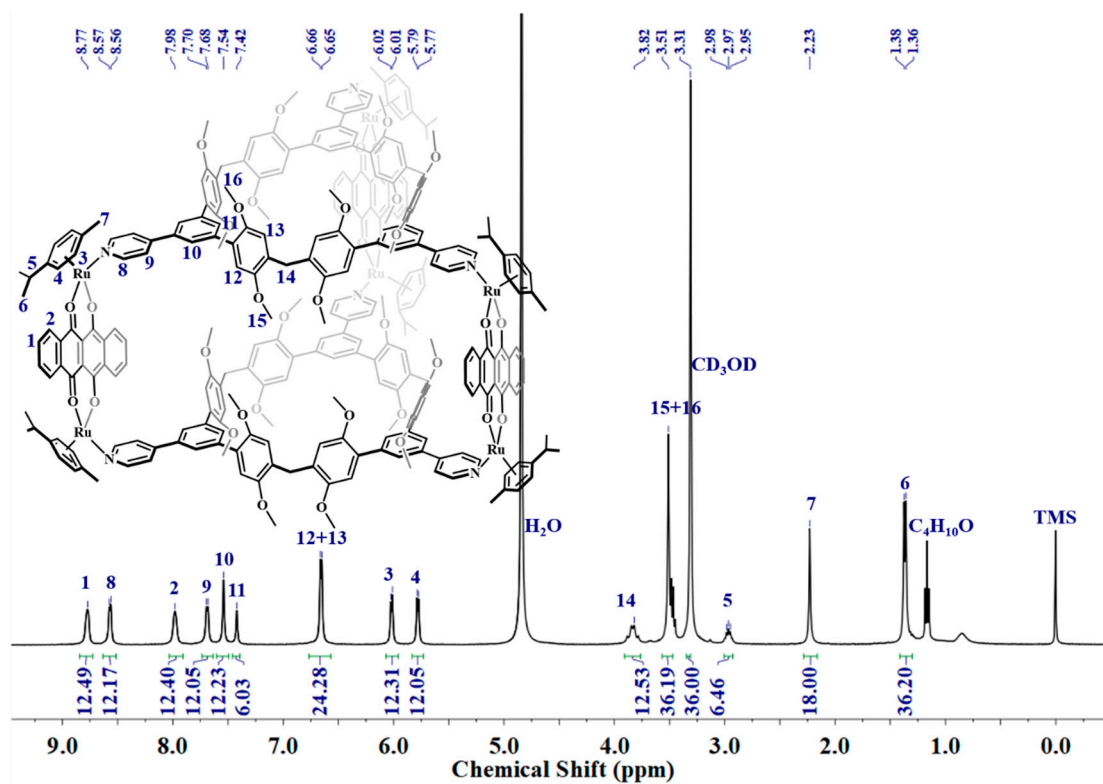

**Figure S19.**  $^1\text{H}$  NMR spectrum (400 MHz,  $\text{CD}_3\text{OD}$ , 298 K) of **M3**.

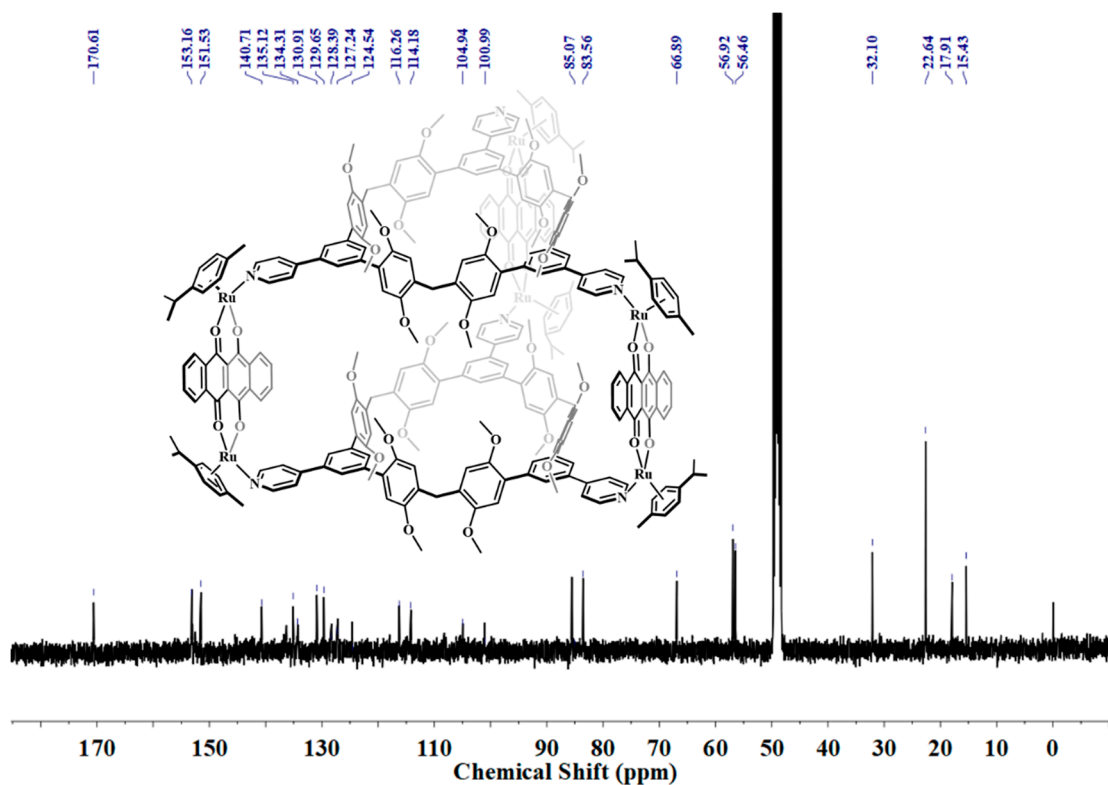

**Figure S20.**  $^{13}\text{C}$  NMR spectrum (100 MHz,  $\text{CD}_3\text{OD}$ , 298 K) of **M3**.

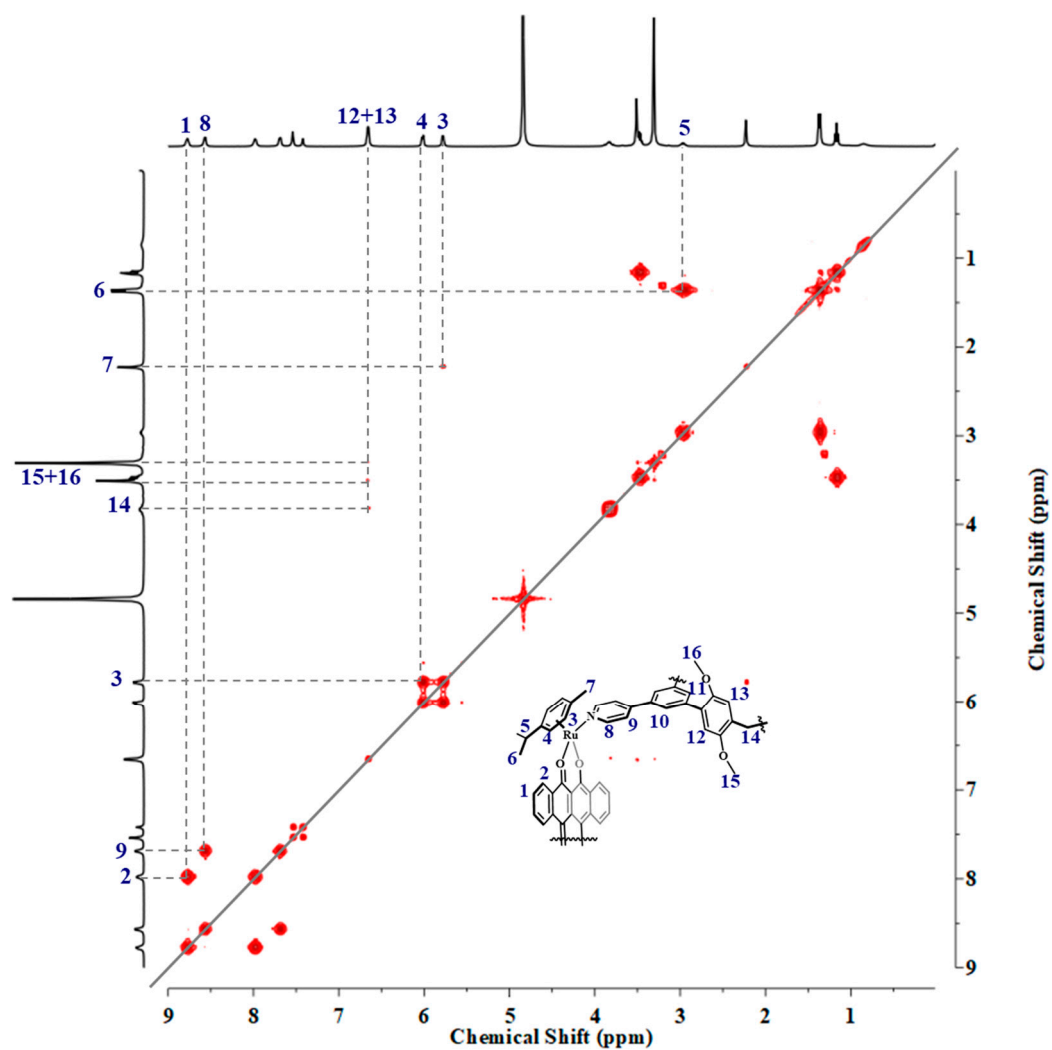

**Figure S21.** 2D COSY spectrum (400 MHz, CD<sub>3</sub>OD, 298 K) of **M3**.

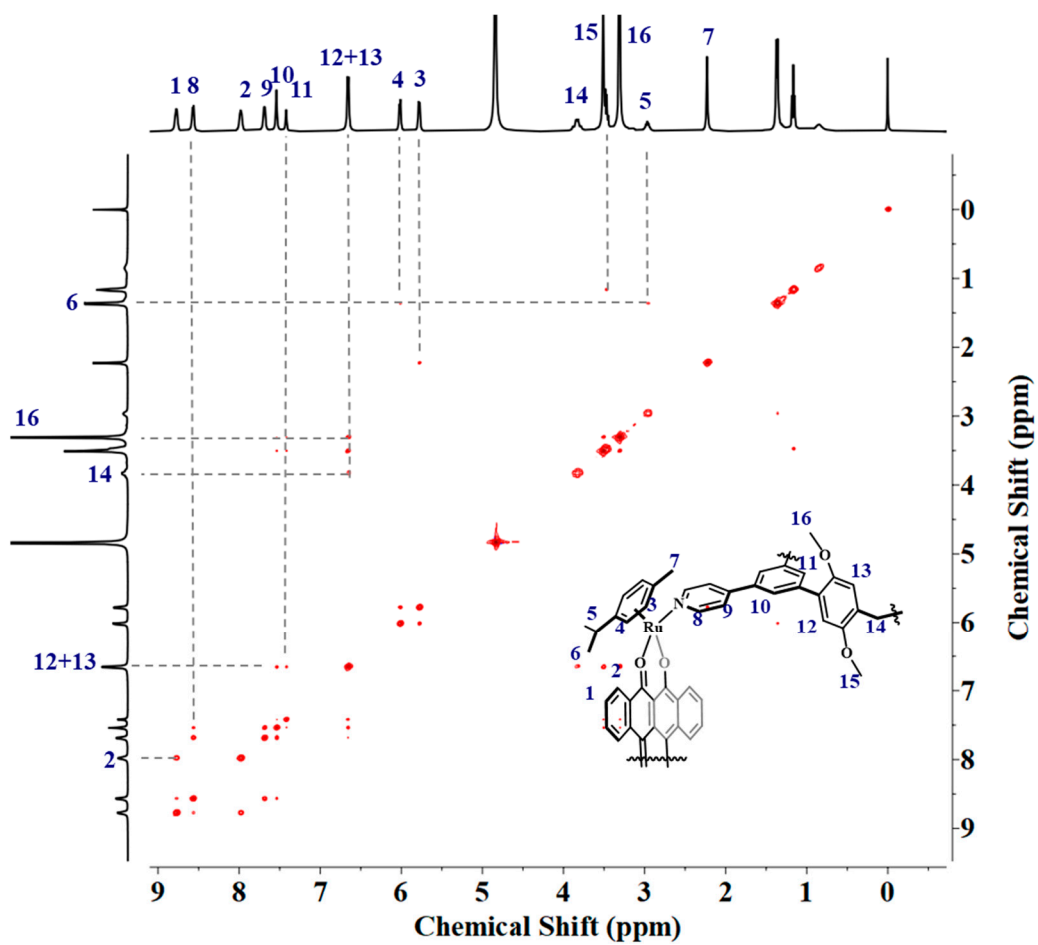

**Figure S22.** 2D NOESY spectrum (400 MHz, CD<sub>3</sub>OD, 298 K) of **M3**.

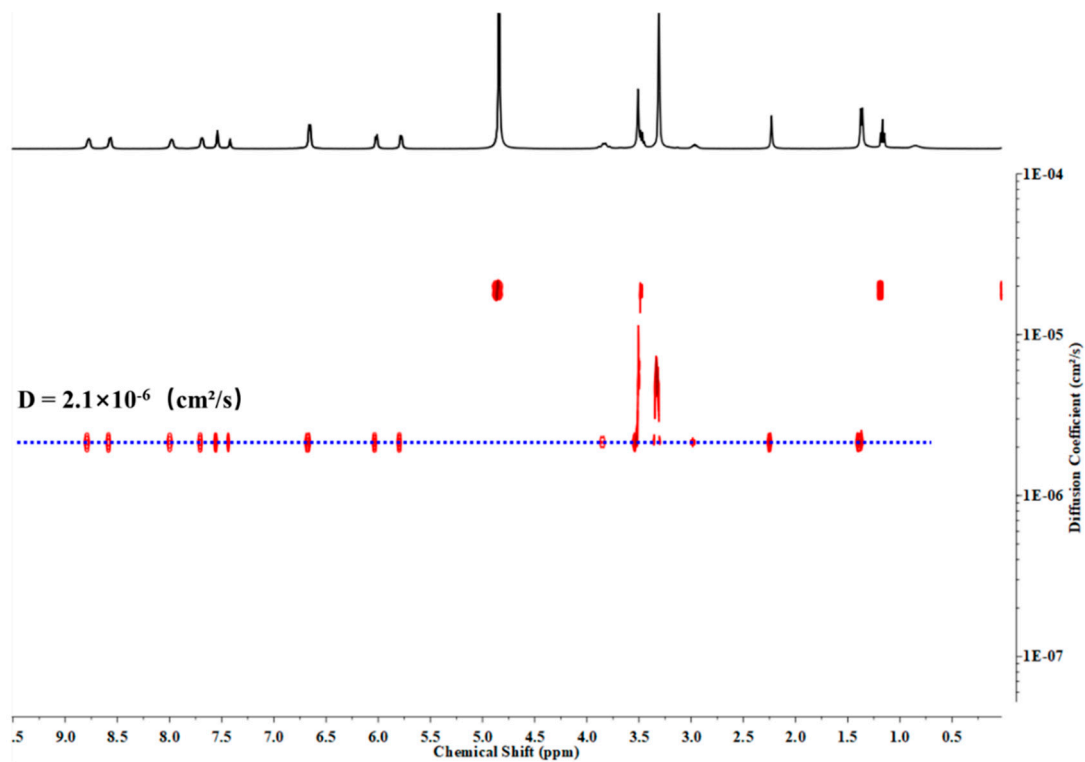

**Figure S23.** DOSY spectrum (400 MHz, CD<sub>3</sub>CN, 298 K) of **M3**.

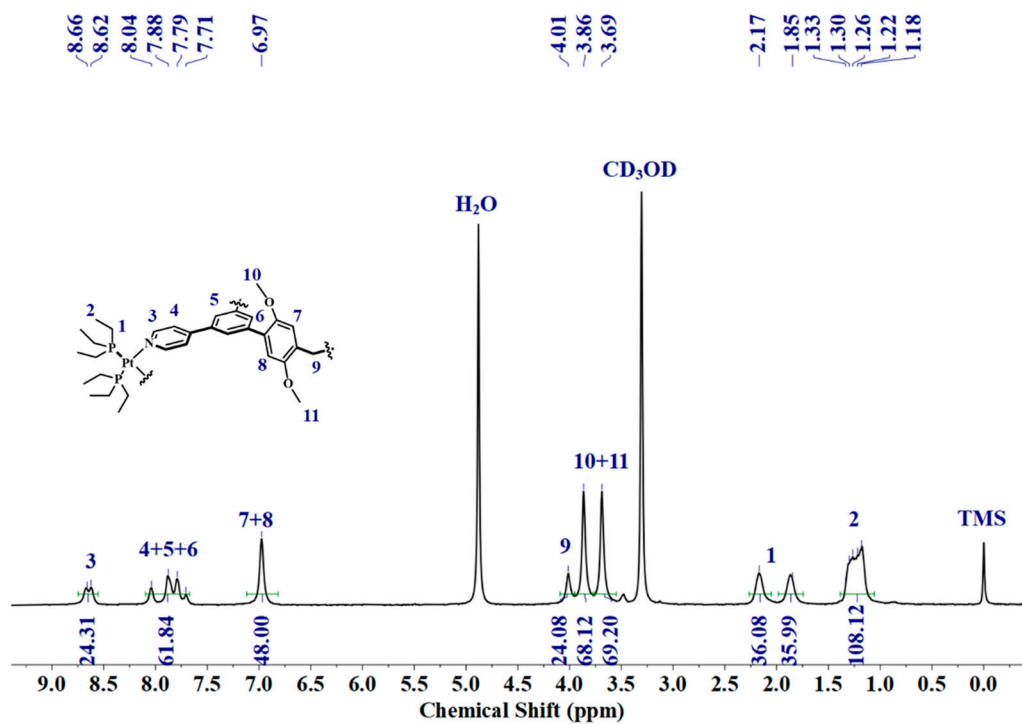

**Figure S24.** <sup>1</sup>H NMR spectrum (400 MHz, CD<sub>3</sub>OD, 298 K) of **M4**.

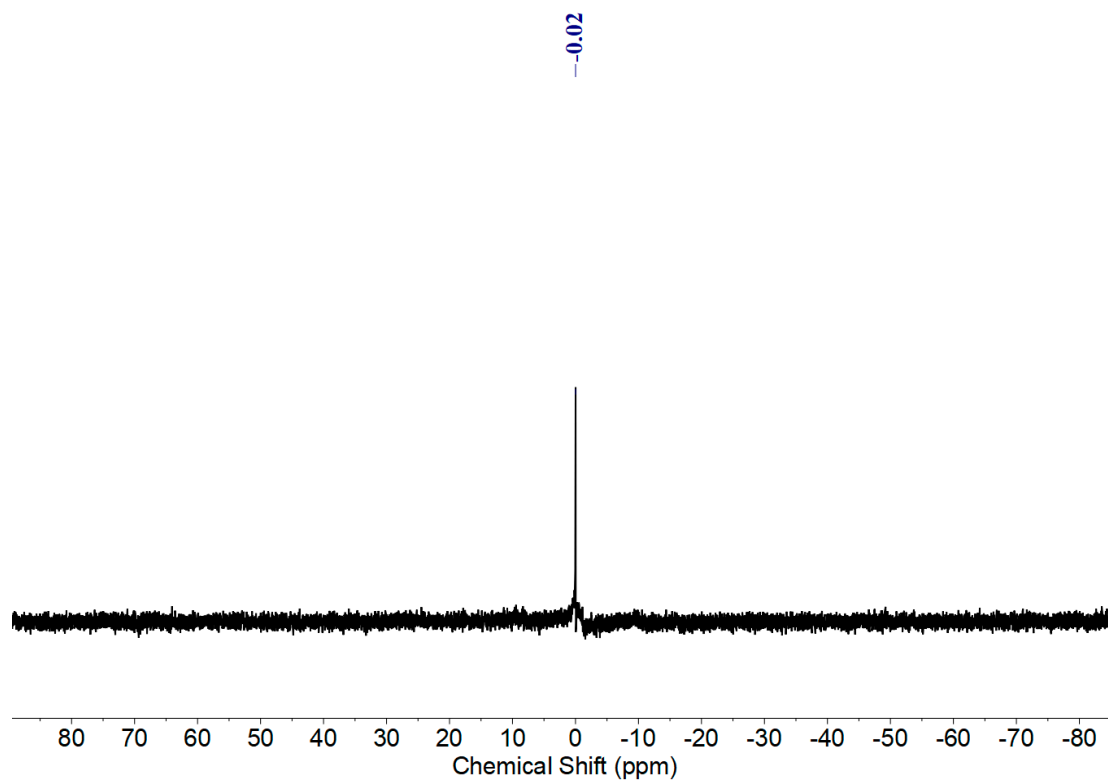

**Figure S25.** <sup>31</sup>P{<sup>1</sup>H} NMR (162 MHz, CD<sub>3</sub>OD, 25 °C) spectrum of **M4**.

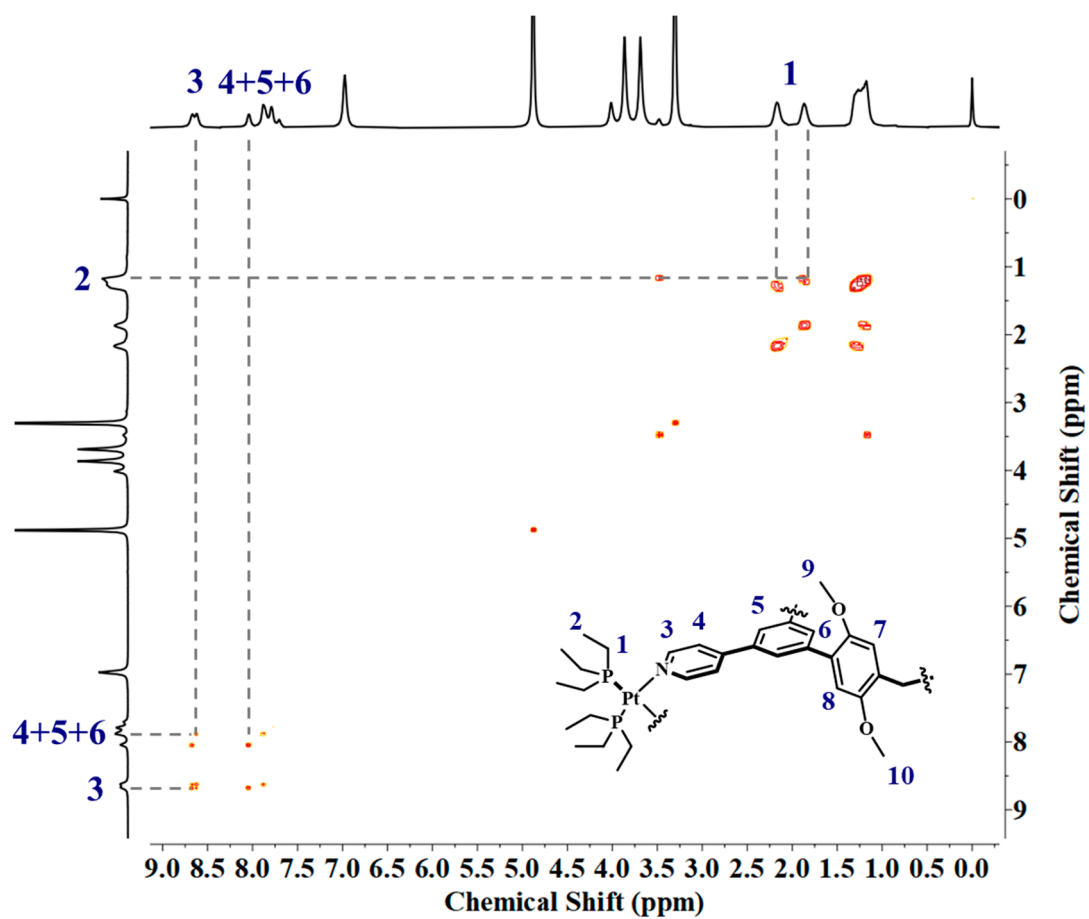

**Figure S26.** 2D COSY spectrum (400 MHz, CD<sub>3</sub>OD, 298 K) of **M4**.





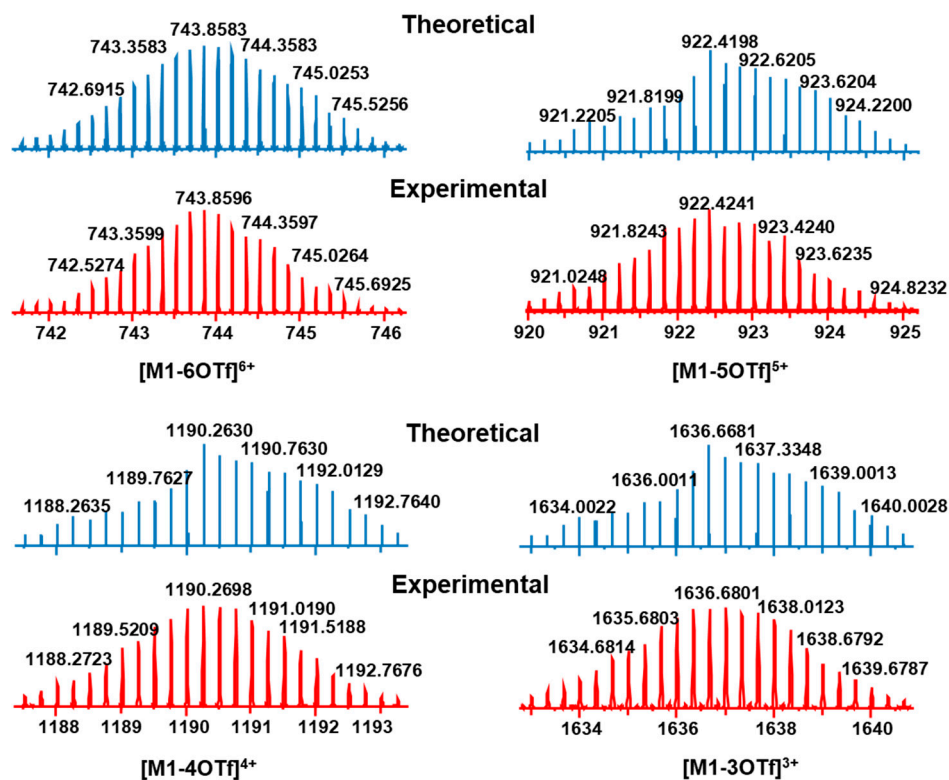

Figure S29. ESI-MS spectra of M1.

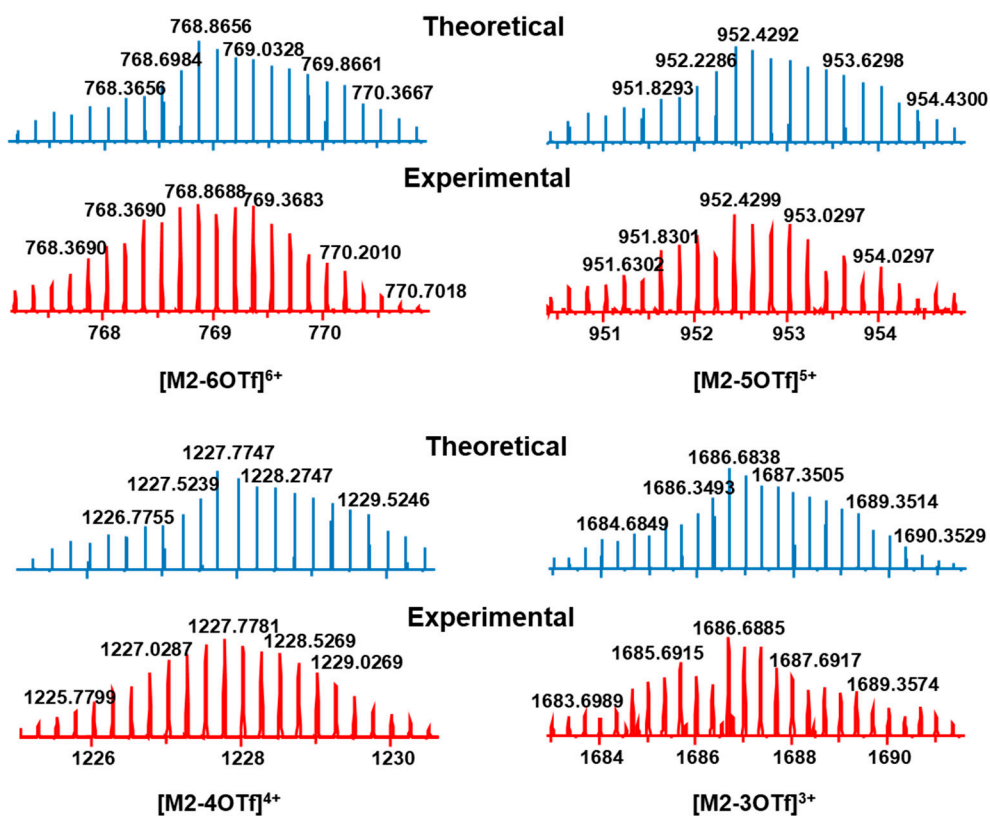

Figure S30. ESI-MS spectra of M2.

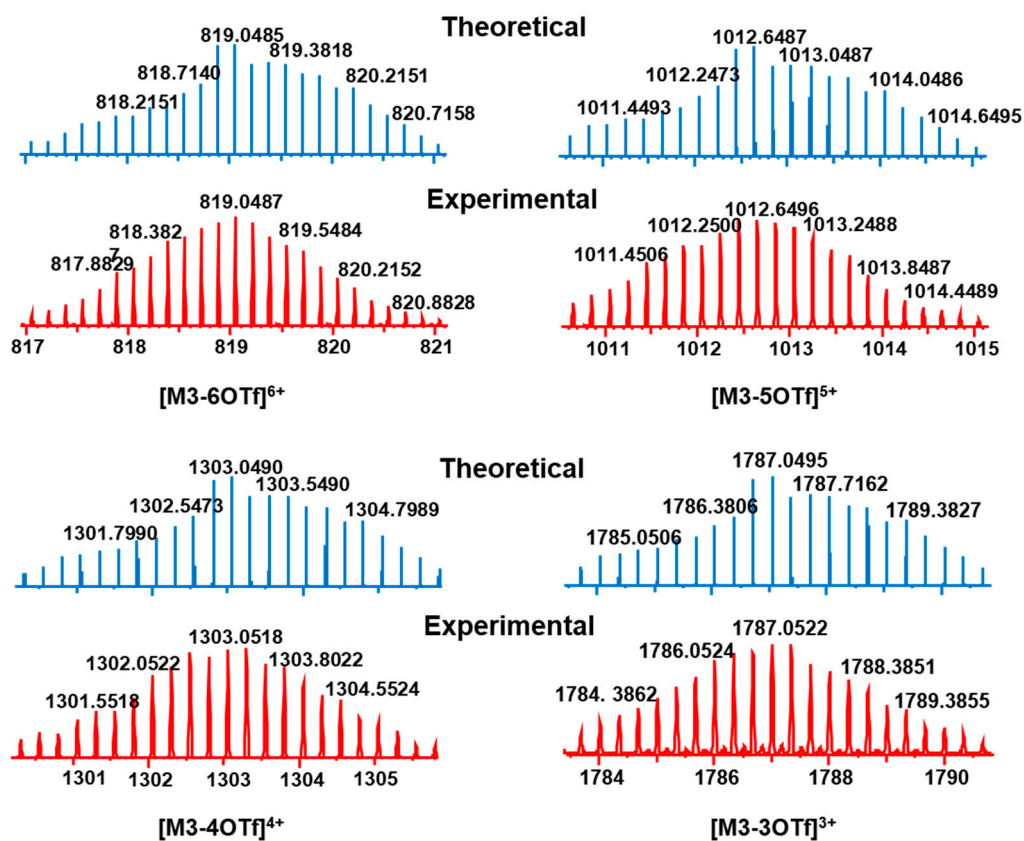

Figure S31. ESI-MS spectra of M3.

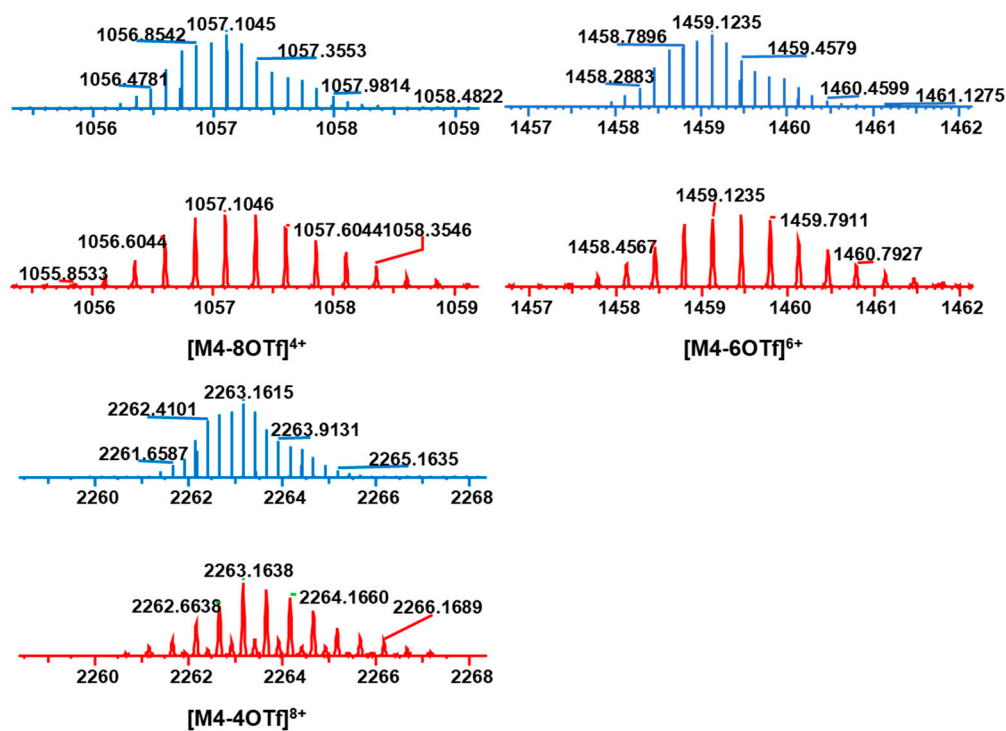

Figure S32. ESI-MS spectra of M4.

### Section III. Single-crystal structures of TP3

**Table S1.** Crystal data of **TP3**.

| Name                                        | TP3                                                            |
|---------------------------------------------|----------------------------------------------------------------|
| CCDC number                                 | 2238729                                                        |
| Empirical formula                           | C <sub>84</sub> H <sub>75</sub> N <sub>3</sub> O <sub>12</sub> |
| Formula weight                              | 1318.47                                                        |
| Temperature / K                             | 293(2)                                                         |
| Radiation / Å                               | CuKα (λ= 1.54184)                                              |
| Crystal system                              | monoclinic                                                     |
| Space group                                 | P2 <sub>1</sub> /n                                             |
| a / Å                                       | 15.9766(11)                                                    |
| b / Å                                       | 25.8315(16)                                                    |
| c / Å                                       | 22.530(2)                                                      |
| α / °                                       | 90                                                             |
| β / °                                       | 104.916(2)                                                     |
| γ / °                                       | 90                                                             |
| Volume/ Å <sup>3</sup>                      | 8985.0(13)                                                     |
| Z                                           | 4                                                              |
| Density (calculated)                        | 0.975 g/cm <sup>3</sup>                                        |
| μ / mm <sup>-1</sup>                        | 0.524                                                          |
| F(000)                                      | 2784.0                                                         |
| Crystal size (mm <sup>3</sup> )             | 0.22×0.2×0.18                                                  |
| 2θ range / °                                | 5.308 to 134.16                                                |
| Index ranges                                | -12 ≤ h ≤ 19<br>-29 ≤ k ≤ 30<br>-26 ≤ l ≤ 21                   |
| Reflections collected                       | 34957                                                          |
| Independent reflections                     | 15949                                                          |
| R(int)                                      | 0.0787                                                         |
| Data/restraints/parameters                  | 15949/126/904                                                  |
| Goodness-of-fit on F <sup>2</sup>           | 1.063                                                          |
| Final R indices [I>2σ(I)]                   | R <sub>1</sub> = 0.1610<br>wR <sub>2</sub> = 0.4034            |
| R indices (all data)                        | R <sub>1</sub> = 0.2388<br>wR <sub>2</sub> = 0.4969            |
| Largest diff. peak/hole / e Å <sup>-3</sup> | 0.79/-0.40                                                     |

**Table S2.** Crystal data of **M2**.

| Name                                        | <b>M2</b>                                                                                                       |
|---------------------------------------------|-----------------------------------------------------------------------------------------------------------------|
| CCDC number                                 | 2238728                                                                                                         |
| Empirical formula                           | C <sub>288</sub> H <sub>258</sub> F <sub>18</sub> N <sub>6</sub> O <sub>54</sub> Ru <sub>6</sub> S <sub>6</sub> |
| Formula weight                              | 5807.00                                                                                                         |
| Temperature / K                             | 99.98(13)                                                                                                       |
| Radiation / Å                               | CuK $\alpha$ ( $\lambda$ = 1.54184)                                                                             |
| Crystal system                              | monoclinic                                                                                                      |
| Space group                                 | I2/a                                                                                                            |
| a / Å                                       | 40.6464(6)                                                                                                      |
| b / Å                                       | 25.0517(3)                                                                                                      |
| c / Å                                       | 34.0854(6)                                                                                                      |
| $\alpha$ / °                                | 90                                                                                                              |
| $\beta$ / °                                 | 108.460(2)                                                                                                      |
| $\gamma$ / °                                | 90                                                                                                              |
| Volume/ Å <sup>3</sup>                      | 32921.9(9)                                                                                                      |
| Z                                           | 141                                                                                                             |
| Density (calculated)                        | 1.232 g/cm <sup>3</sup>                                                                                         |
| $\mu$ / mm <sup>-1</sup>                    | 0.737                                                                                                           |
| F(000)                                      | 12900.0                                                                                                         |
| Crystal size (mm <sup>3</sup> )             | 0.15×0.11×0.1                                                                                                   |
| 2 $\theta$ range / °                        | 4.462 to 149.622                                                                                                |
| Index ranges                                | -48 ≤ h ≤ 50<br>-30 ≤ k ≤ 26<br>-41 ≤ l ≤ 42                                                                    |
| Reflections collected                       | 96284                                                                                                           |
| Independent reflections                     | 32132                                                                                                           |
| R(int)                                      | 0.0265                                                                                                          |
| Data/restraints/parameters                  | 32132/42/1555                                                                                                   |
| Goodness-of-fit on F <sup>2</sup>           | 2.401                                                                                                           |
| Final R indices [I>2sigma(I)]               | R <sub>1</sub> = 0.2146<br>wR <sub>2</sub> = 0.5356                                                             |
| R indices (all data)                        | R <sub>1</sub> = 0.2375<br>wR <sub>2</sub> = 0.5551                                                             |
| Largest diff. peak/hole / e Å <sup>-3</sup> | 6.25/-1.46                                                                                                      |

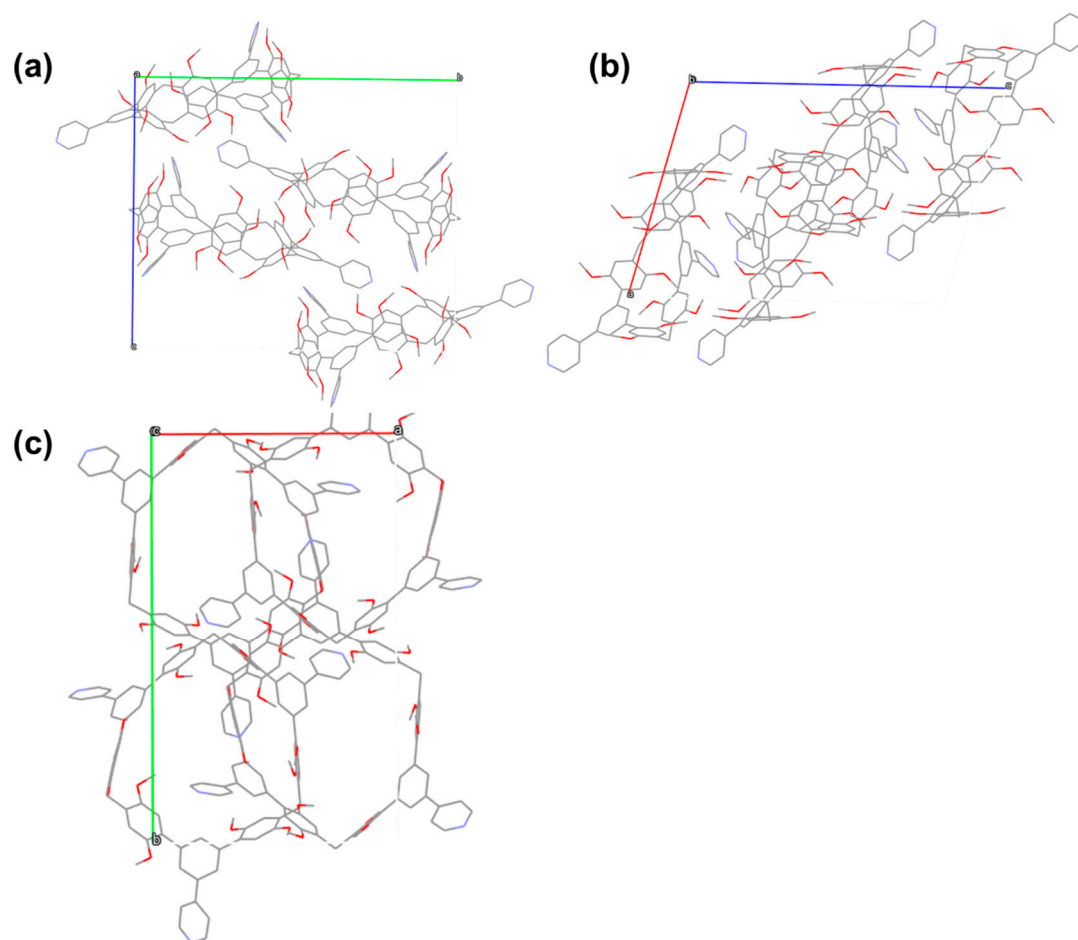

**Figure S33.** Packing diagram of **TP3** view along the (a) a-axis, (b) b-axis, and (c) c-axis.

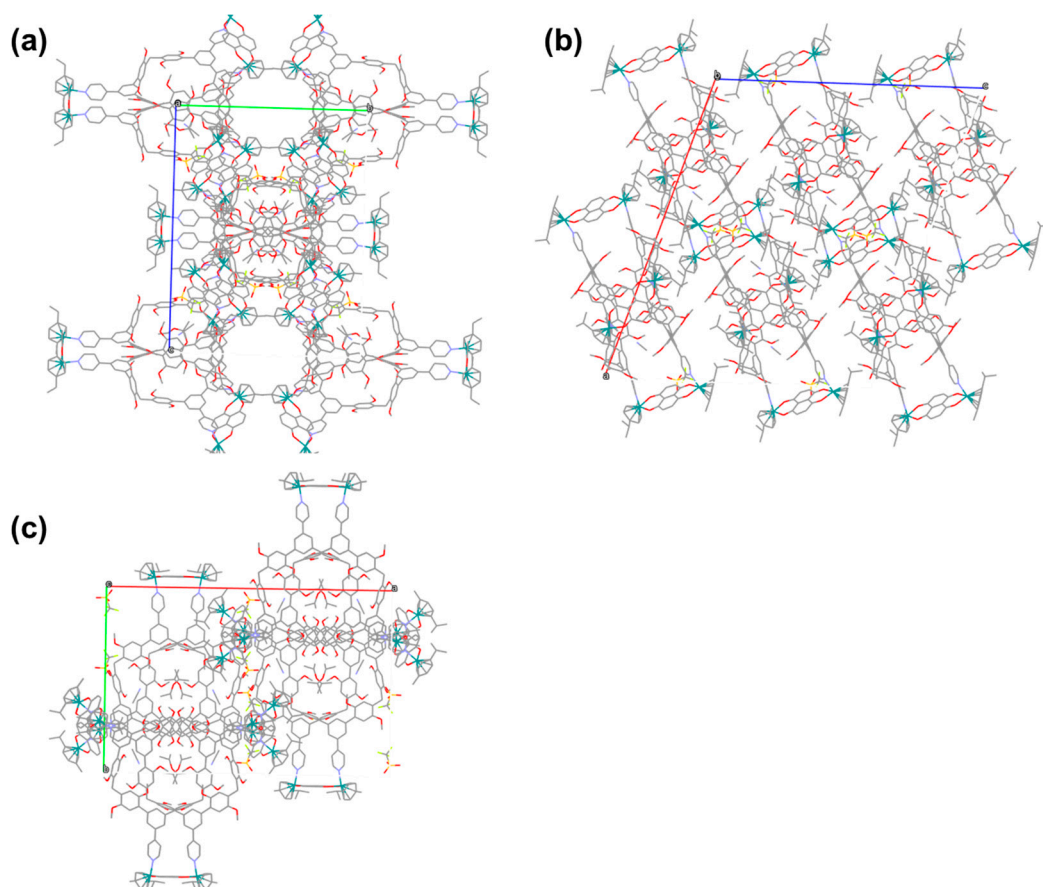

**Figure S34.** Packing diagram of **M2** view along the (a) a-axis, (b) b-axis, and (c) c-axis.
